# Supplementary material for: Dissecting the Anticancer Mechanism of Trifluoperazine on Pancreatic Ductal Adenocarcinoma
Source: PubMed Central journal article supplement (PMC6966621; doi:10.3390/cancers11121869), 2019-11-26

Supplementary Materials

# Dissecting the Anticancer Mechanism of Trifluoperazine on Pancreatic Ductal Adenocarcinoma

Can Huang, Wenjun Lan, Nicolas Fraunhoffer, Analía Meilerman, Juan Iovanna and Patricia Santofimia-Castaño

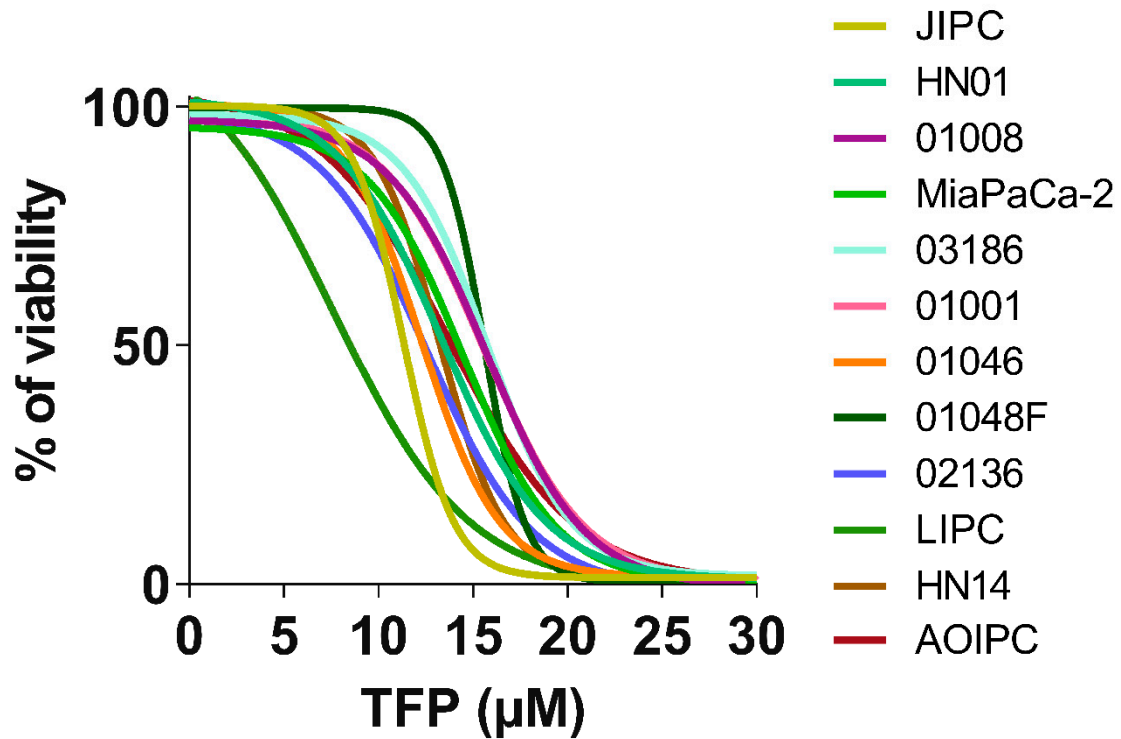

**Figure S1.** Trifluoperazine induces cell death via apoptosis and necroptosis in PDAC cells. Viability of MiaPaCa-2 cells and 11 PDX-derived cell lines upon a 24-h treatment with TFP at increasing concentrations of trifluoperazine was measured.

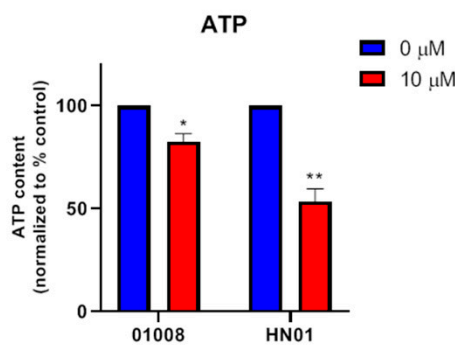

**Figure S2.** Trifluoperazine decreases ATP production in PDAC cells. Cells were incubated with TFP at 10 μM, and ATP content was measured after 24 h of treatment. For each treatment, statistical sig-

nificance is \*  $p < 0.05$ , \*\*  $p < 0.01$ , compared with untreated cells (Student's 2-tailed unpaired  $t$ -Test). Data represent mean  $\pm$  SEM,  $n = 3$  (with technical triplicates).

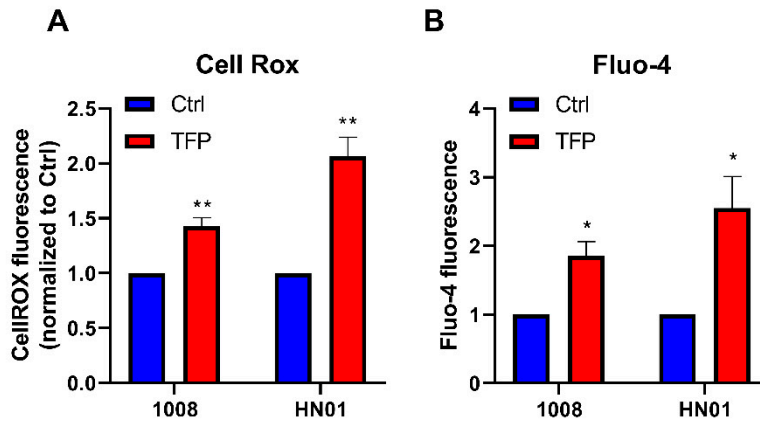

**Figure S3.** Trifluoperazine promotes mitochondrial and ER coupled stress (A) ROS production detected using MitoSOX Red by flow cytometry analysis in TFP and non-treated cells. (B) Flow cytometry analysis with Fluo-4-AM performed to determine cytosolic calcium concentration. For each treatment, statistical significance is \*  $p < 0.05$ , \*\*  $p < 0.01$ , compared with untreated cells (Student's 2-tailed unpaired  $t$ -Test). Data represent mean  $\pm$  SEM,  $n = 3$  (with technical triplicates).

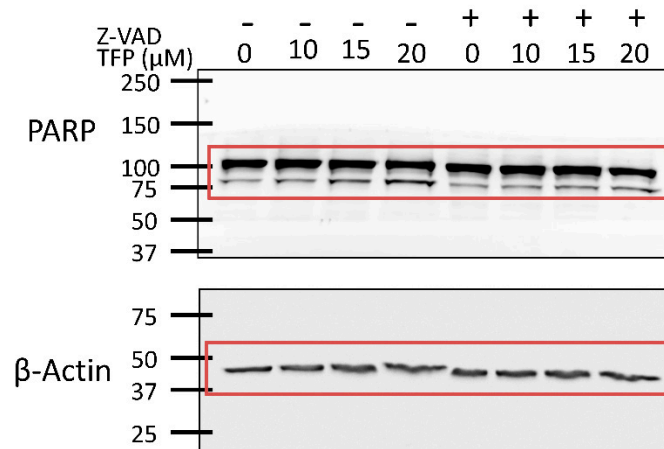

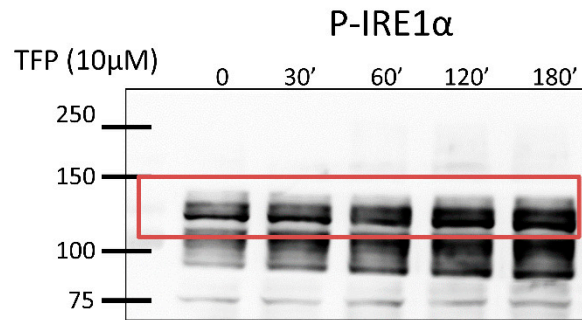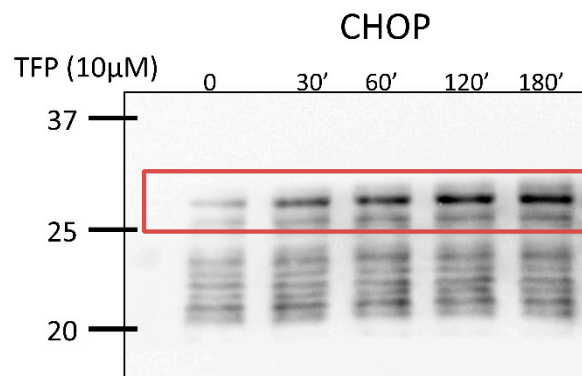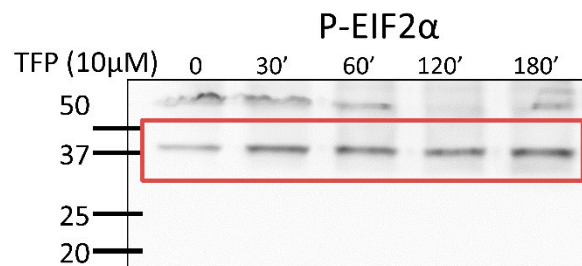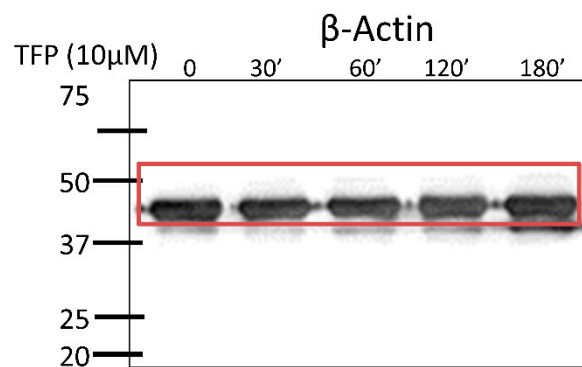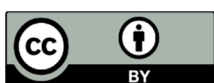

Supplement: cancers-11-01869-s001.pdf [file cancers-11-01869-s001.pdf]
